# Supplementary material for: Differences in the Structure and Antimicrobial Activity of Hydrazones Derived from Methyl 4-Phenylpicolinimidate
Source: MDPI journal article supplement (doi:10.3390/ma15093085), 2022-04-24
Supplement: s1 [file s1]

# Hydrazones Derived from Methyl 4-Phenylpicolinimide: Differences in Structure and Antimicrobial Activity

Katarzyna Gobis <sup>1,\*</sup>, Małgorzata Szczesio <sup>2</sup>, Andrzej Olczak <sup>2</sup>, Izabela Korona-Głowniak <sup>3</sup>, Ewa Augustynowicz-Kopec <sup>4</sup>, Ida Mazernt-Politowicz <sup>2</sup>, Dagmara Ziembicka <sup>1</sup> and Marek L. Głowka <sup>2</sup>

<sup>1</sup> Department of Organic Chemistry, Medical University of Gdańsk, 107 Gen. Hallera Av., 80-438 Gdansk, Poland; katarzyna.gobis@gumed.edu.pl (K.G.); dagmara.ziembicka@gumed.edu.pl (D.Z.)

<sup>2</sup> Institute of General and Ecological Chemistry, Faculty of Chemistry, Lodz University of Technology, Zeromskiego 116, 90-924 Lodz, Poland; malgorzata.szczesio@p.lodz.pl (M.S.); andrzej.olczak@p.lodz.pl (A.O.); marek.glowka@p.lodz.pl (M.L.G.); ida.mazerant-politowicz@dokt.p.lodz.pl (I.M.P.)

<sup>3</sup> Chair and Department of Pharmaceutical Microbiology, Faculty of Pharmacy, Medical University of Lublin, 1 Chodźki Street, 20-093 Lublin, Poland; iza.glowniak@umlub.pl

<sup>4</sup> Department of Microbiology, National Tuberculosis and Lung Diseases Research Institute, 26 Płocka Str., 01-138 Warsaw, Poland; e.kopec@igichp.edu.pl

\* Correspondence: katarzyna.gobis@gumed.edu.pl; Tel.: +48-58-349-16-47

## Supplementary Materials

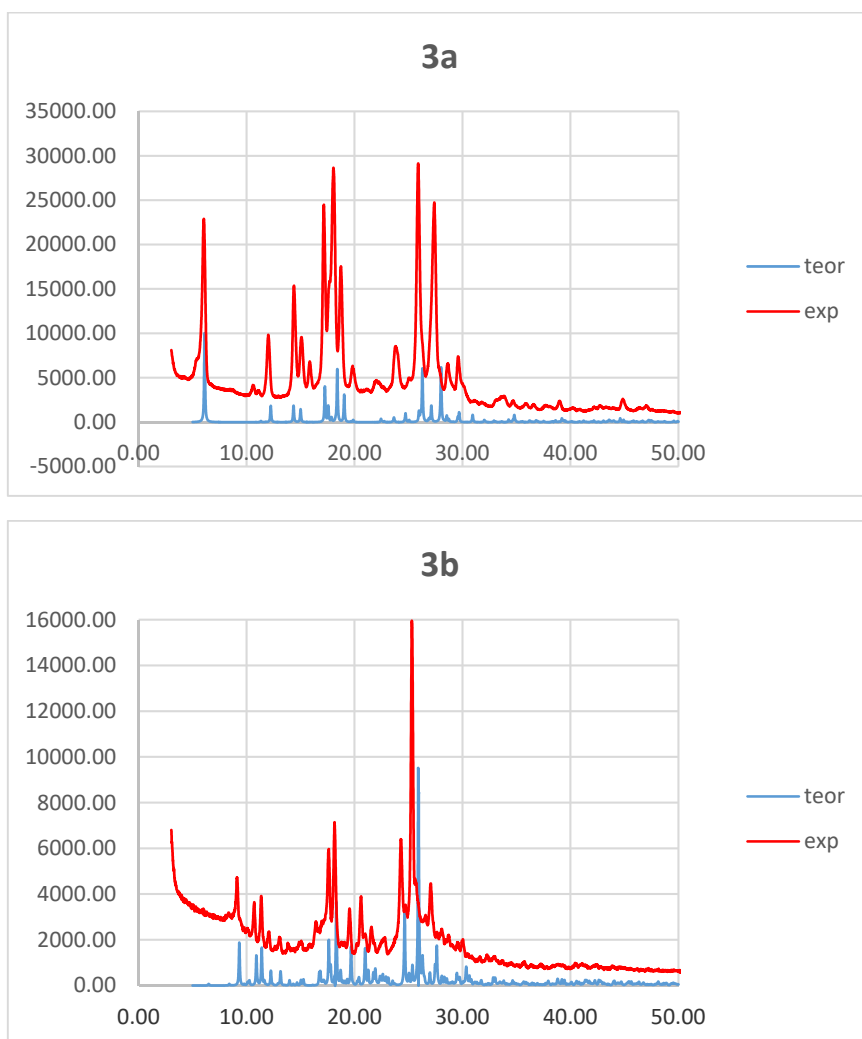

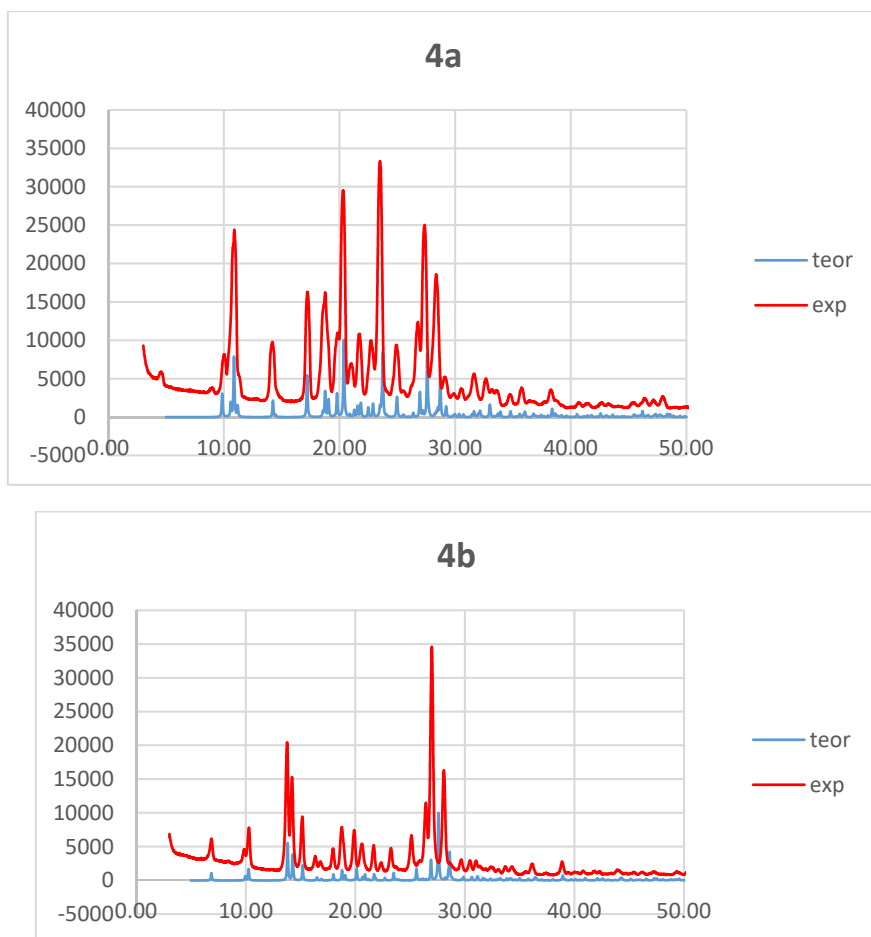

**Figure S1.** Powder diffraction patterns for the studied compounds- experimental and theoretical calculated for single crystal structure.

**Table S1.** Selected bonds lengths (Å) in the studied structures and the mean values found in similar compounds within Cambridge Structural Database [54]. CSD quests for molecular fragments are shown in Scheme A1. "X" denoted -NH<sub>2</sub> in **3a,b** and =O in **4a,b**, respectively.

| Crystal Structure(s) | C1-C            | C1-N2           | N2-N3           | N3-C4           | C4-C41          | C4-X4(N,O)      |
|----------------------|-----------------|-----------------|-----------------|-----------------|-----------------|-----------------|
| <b>3a</b>            | 1.440(3)        | 1.285(2)        | 1.390(2)        | 1.311(2)        | 1.491(2)        | 1.342(2)        |
| <b>3b</b>            | 1.453(3)        | 1.290(3)        | 1.390(3)        | 1.312(3)        | 1.489(3)        | 1.333(3)        |
|                      | 1.452(3)        | 1.292(3)        | 1.392(3)        | 1.304(3)        | 1.496(3)        | 1.335(3)        |
|                      | 1.448(4)        | 1.280(5)        | 1.397(3)        | 1.298(4)        | 1.485(4)        | 1.344(5)        |
|                      | 1.441(4)        | 1.293(4)        | 1.391(3)        | 1.313(3)        | 1.482(4)        | 1.343(4)        |
| Mean for <b>3a,b</b> | <b>1.447(5)</b> | <b>1.288(3)</b> | <b>1.391(3)</b> | <b>1.310(5)</b> | <b>1.489(4)</b> | <b>1.339(3)</b> |
| Mean (CSD)           | <b>1.464(4)</b> | <b>1.279(5)</b> | <b>1.402(4)</b> | <b>1.306(6)</b> | <b>1.489(3)</b> | <b>1.341(4)</b> |
| <b>4a</b>            | 1.445(2)        | 1.280(2)        | 1.368(2)        | 1.361(2)        | 1.502(2)        | 1.222(1)        |
| <b>4b</b>            | 1.447(2)        | 1.282(2)        | 1.369(2)        | 1.355(2)        | 1.504(2)        | 1.226(2)        |
| Mean for <b>4a,b</b> | <b>1.446(2)</b> | <b>1.281(2)</b> | <b>1.369(2)</b> | <b>1.358(2)</b> | <b>1.503(2)</b> | <b>1.224(2)</b> |
| Mean (CSD)           | <b>1.459(8)</b> | <b>1.278(5)</b> | <b>1.375(5)</b> | <b>1.349(6)</b> | <b>1.500(5)</b> | <b>1.224(5)</b> |

**Table S2.** Selected torsion angles and dihedral angles (phy/phe) between planes defined by the pyridine and phenyl rings (°).

| Crystal structure | C-C1-N2-N3                            | C1-N2-N3-C4                                      | N2-N3-C4-C41                                     | N3-C4-C41-N42                                  | pyr/phe                                  |
|-------------------|---------------------------------------|--------------------------------------------------|--------------------------------------------------|------------------------------------------------|------------------------------------------|
| 3a                | -179.8(1)                             | -178.3(1)                                        | 178.9(1)                                         | -179.8(1)                                      | 28.5(2)                                  |
| 3b                | -1.2(4)<br>0.3(3)<br>2.8(4)<br>0.1(4) | -178.9(2)<br>-175.3(2)<br>-169.5(3)<br>-177.4(2) | -177.2(2)<br>-179.4(2)<br>-175.3(2)<br>-177.9(2) | 170.3(2)<br>-172.7(2)<br>-177.2(3)<br>176.8(2) | 24.8(2)<br>31.8(3)<br>31.9(3)<br>13.8(2) |
| 4a                | 179.1(1)                              | -173.3(1)                                        | 179.2(1)                                         | 1.2(2)                                         | 37.5(2)                                  |
| 4b                | -178.4(1)                             | -173.8(1)                                        | 177.1(1)                                         | 6.7(2)                                         | 28.6(2)                                  |

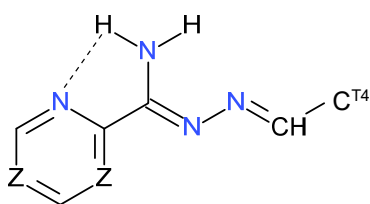

3a,3b, Z-CH or N  
Found - 5 structures,  
6 independent molecules

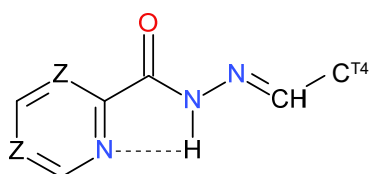

4a,4b, Z-CH or N  
Found - 39 structures,  
49 independent molecules

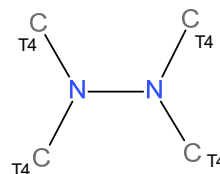

Found - 3 structures with N-N bond lengths of about  
1.50Å [Refcode: AZBNOW, RETHAZ, SOFQOT]

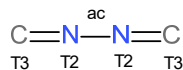

Found - 536 structures,  
619 independent molecules  
1.403(9) mean N-N  
1.208(8) mean N=C

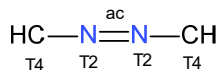

Found - 7 structures,  
7 independent molecules  
1.234(5) mean N=N

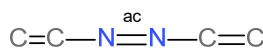

Found - 3 structures,  
4 independent molecules  
1.283(9) mean N=N  
1.382(9) mean N-C

**Scheme S1.** CSD quests for similar molecular fragments. Tn refer to number (n) of atoms bonded.
